# Supplementary material for: 1.5T Magnetic Resonance-Guided Stereotactic Body Radiotherapy for Localized Prostate Cancer: Preliminary Clinical Results of Clinician- and Patient-Reported Outcomes
Source: MDPI journal article supplement (doi:10.3390/cancers13194866), 2021-09-28
Supplement: s1 [file s1]

**Table S1.** Planning objectives and dose constraints for organs-at-risk (OARs).

| Structure                   | Low- and intermediate-risk | High-risk         |
|-----------------------------|----------------------------|-------------------|
| <b>Planning objectives</b>  |                            |                   |
| <i>PTV</i>                  | V38.8 Gy < 0.03cc          | V42 Gy < 0.03cc   |
|                             | V36.25 Gy > 95%            | V40 Gy > 95%      |
| <b>OAR dose constraints</b> |                            |                   |
| <i>Rectum</i>               | V38.1 Gy < 0.03cc          | V41.6 Gy < 0.03cc |
|                             | V34.4 Gy < 3cc             | V38 Gy < 3cc      |
|                             | V32.6 Gy < 10%             | V36 Gy < 10%      |
|                             | V29 Gy < 20%               | V32 Gy < 20%      |
|                             | V18.1 Gy < 50%             | V20 Gy < 50%      |
| <i>Bladder</i>              | V38.1 Gy < 0.03cc          | V41.6 Gy < 1cc    |
|                             | V32.6 Gy < 10%             | V37 Gy < 5cc      |
|                             | V18.1 Gy < 50%             | V36 Gy < 10%      |
|                             |                            | V20 Gy < 50%      |
| <i>Femoral Head</i>         |                            | V18.1 Gy < 60%    |
|                             | V20 Gy < 10cc              | V20 Gy < 10cc     |
| <i>Penile Bulb</i>          | Dmax < 30 Gy               | Dmax < 30 Gy      |
|                             | V20 Gy < 3cc               | D2% < 28.5 Gy     |
|                             |                            | V20 Gy < 3cc      |
|                             | Dmax < 36.25 Gy            | Dmax < 40 Gy      |
|                             |                            | Dmean < 16 Gy     |

Dmax/Dmean = maximum/mean dose; PTV = planning target volume.
